# Supplementary material for: The influence of organically intercalated montmorillonites on the interfacial tension and structure of oil-in-water nanoemulsions
Source: Royal Society of Chemistry journal article supplement (doi:10.1039/c8ra10595b), 2019-01-01
Supplement: c8ra10595b1.pdf [file c8ra10595b1.pdf]

## Supporting information

### The Influence of Organic Intercalation Montmorillonites on the Interfacial Tension and Structure of Oil-in-Water Nanoemulsions

Fangfang Peng, Yangchuan Ke\*, Yi Zhao, Xu Hu, Xi Zhao

College of Science, China University of Petroleum, Beijing, 102249, Correspondence to

[kyc012@sohu.com](mailto:kyc012@sohu.com)

Molecular Structure of Brij 30 and G16-2-16,

Brij 30 :  $\text{CH}_3(\text{CH}_2)_{10}\text{CH}_2(\text{OCH}_2\text{CH}_2)_n\text{OH}$

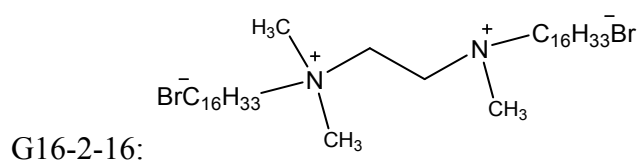

Tab.S1 Zeta potential of nanoemulsions measured by DLS method

| G16-2-16<br>%w/v | OMt<br>%w/v          | Brij 30<br>%w/v | Paraffin oil<br>%w/v | 0.01 M NaCl<br>solution %w/v | Zeta potential<br>mV |
|------------------|----------------------|-----------------|----------------------|------------------------------|----------------------|
| 0.15             | 0                    | 2.56            | 3.2                  | 94                           | 18.8                 |
|                  | $1.7 \times 10^{-3}$ | 2.56            | 3.2                  | 94                           | 43.4                 |
|                  | $3.4 \times 10^{-3}$ | 2.56            | 3.2                  | 94                           | 38.2                 |
|                  | $5.1 \times 10^{-3}$ | 2.56            | 3.2                  | 94                           | 26.8                 |
|                  | $6.8 \times 10^{-3}$ | 2.56            | 3.2                  | 94                           | 28.5                 |

|      |                      |      |     |    |      |
|------|----------------------|------|-----|----|------|
| 0.20 | 0                    | 2.56 | 3.2 | 94 | 21.3 |
|      | $1.7 \times 10^{-3}$ | 2.56 | 3.2 | 94 | 46.5 |
|      | $3.4 \times 10^{-3}$ | 2.56 | 3.2 | 94 | 45.1 |
|      | $5.1 \times 10^{-3}$ | 2.56 | 3.2 | 94 | 28.8 |
|      | $6.8 \times 10^{-3}$ | 2.56 | 3.2 | 94 | 34.2 |

Tab.S2 Interfacial tension of crude oil/ nanoemulsions at equilibrium time ( 45 °C)

| OMt<br>%w/v          | 0.15 %w/v G16-2-16 | 0.20 %w/v G16-2-16 |
|----------------------|--------------------|--------------------|
| Equilibrium time     | 1800s              | 2000s              |
| 0                    | 0.021              | 0.07               |
| $3.4 \times 10^{-3}$ | 0.006              | 0.225              |
| $6.8 \times 10^{-3}$ | 0.01               | 0.016              |

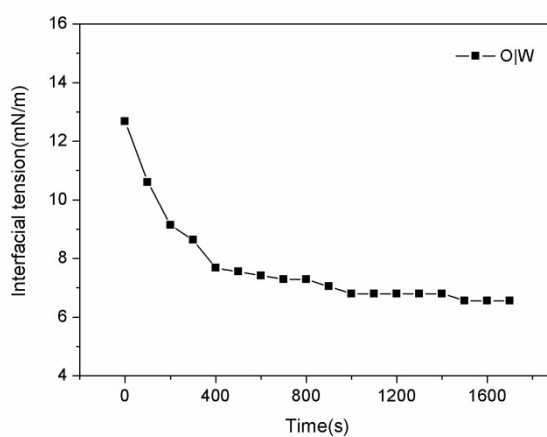

Fig. S1 Interfacial tension of crude oil/ water as a function of time at 45 °C

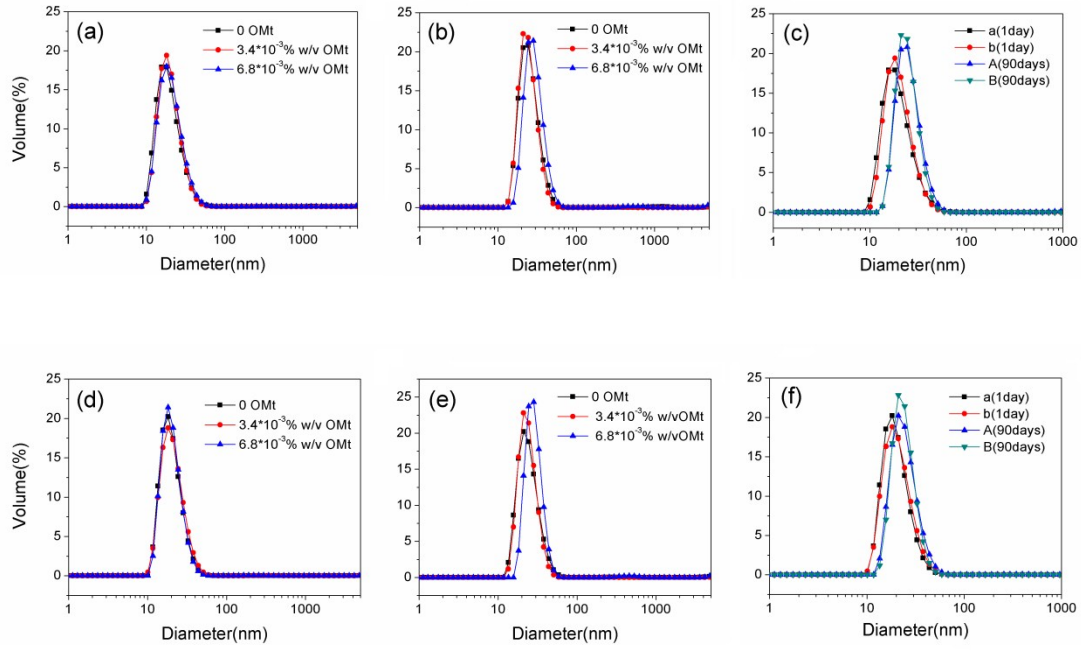

Fig.5 Nanoemulsion droplet sizes measured by DLS

Nanoemulsions with 0.15%w/v G16-2-16 (1 day); (b) G16-2-16 nanoemulsions with 0.15wt% (90 days); (c) Size variation of nanoemulsions with 0.15%w/v G16-2-16 storing for 1 day and 90 days (a, A: without OMT; b, B: with  $3.4 \times 10^{-3}\%$  w/v OMT); (d) nanoemulsions with 0.20%w/v G16-2-16 (1 day); (e) nanoemulsions with 0.20%w/v G16-2-16 (90 days); (f) Size variation of nanoemulsions with 0.20%w/v G16-2-16 storing for 1 day and 90 days (a, A: without OMT; b, B: with  $3.4 \times 10^{-3}\%$  w/v OMT).

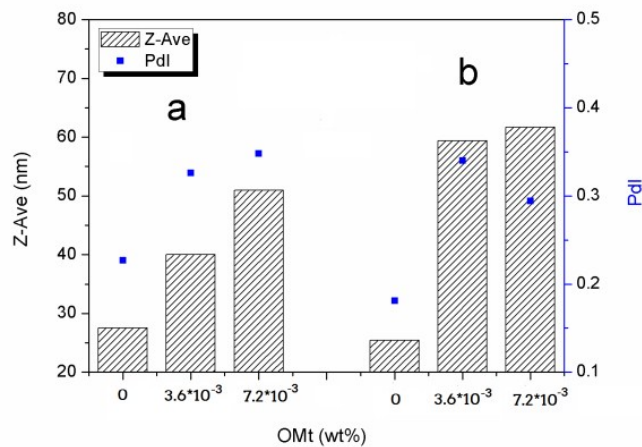

Fig. S3 Z-average diameter and the Polydispersity Index(PDI) of Nano-emulsion measured by DLS method
